# Supplementary material for: Clinical effects of Lewy body pathology in cognitively impaired individuals
Source: PubMed Central journal article supplement (PMC10427416; doi:10.1038/s41591-023-02449-7), 2023-07-18
Supplement: 41591_2023_2449_MOESM1_ESM.pdf [file 41591_2023_2449_MOESM1_ESM.pdf]

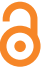

---

# Clinical effects of Lewy body pathology in cognitively impaired individuals

---

In the format provided by the authors and unedited

# ONLINE SUPPLEMENT

## SUPPLEMENTARY FIGURES

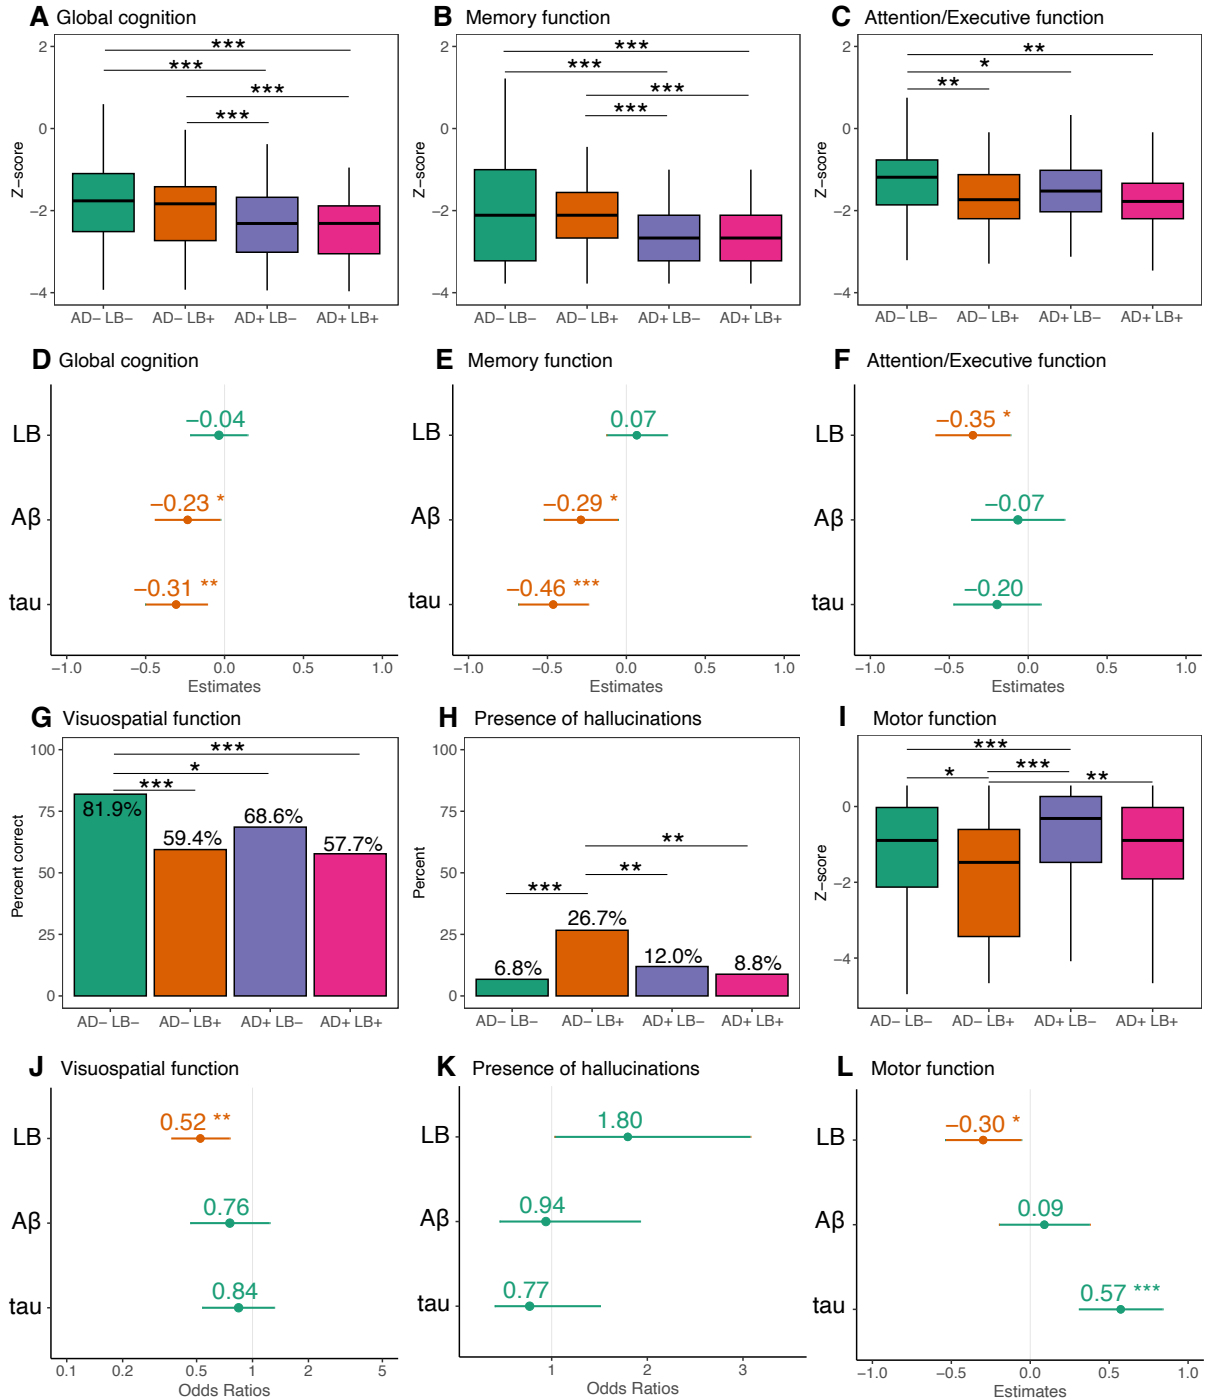

**Supplementary Figure 1A-L. Comparisons between AD/LB groups and the independent effects of LB, A $\beta$  and tau pathologies on clinical outcomes with corrections for multiple comparisons.**

The analyses were performed using linear regression models with AD/LB groups (A-C, G-I) or all three binarized pathologies (D-F, J-L) as independent variables in the same model, adjusted for age, sex, education (for cognitive outcomes), and cognitive stage (MCI/dementia). In G, H, J, and K, logistic regression models with the same covariates were used since the outcomes were binary. Outcomes were z-scored (according to the distribution in A $\beta$ -negative controls) cognitive tests (A-F)

and motor questionnaires (I, L) or binary assessment of correct visuospatial task (G, J) or presence of hallucinations (H, K). Boxes (A-C, G-I) show interquartile range, the horizontal lines are medians and the whiskers were plotted using the Tukey method. In D-F, and L, the dot/center shows the estimate of the pathology and the error bars the 95% confidence interval, where negative values equal worse performance. In J and K, the dot/center represents odds ratios where values below 1 equals a decrease, and the error bars the 95% CI of the odds ratios. Worse performance is marked in red. AD positivity was defined as presence of both A $\beta$  and tau. LB positivity was defined as presence of abnormal  $\alpha$ -syn SAA result. 302 participants were AD-/LB-, 106 AD-/LB+, 377 AD+/LB-, and 98 AD+/LB+. 204 were LB+, 607 A $\beta$ +, and 489 tau+. Multiple comparison corrections were applied per outcome using the FDR method (at  $\alpha=0.05$ ). Missing data are shown in Supplementary Table 1.  
\* p<0.05; \*\* p<0.01; \*\*\* p<0.001

Abbreviations: A $\beta$ , beta-amyloid; AD, Alzheimer's disease. LB, Lewy body

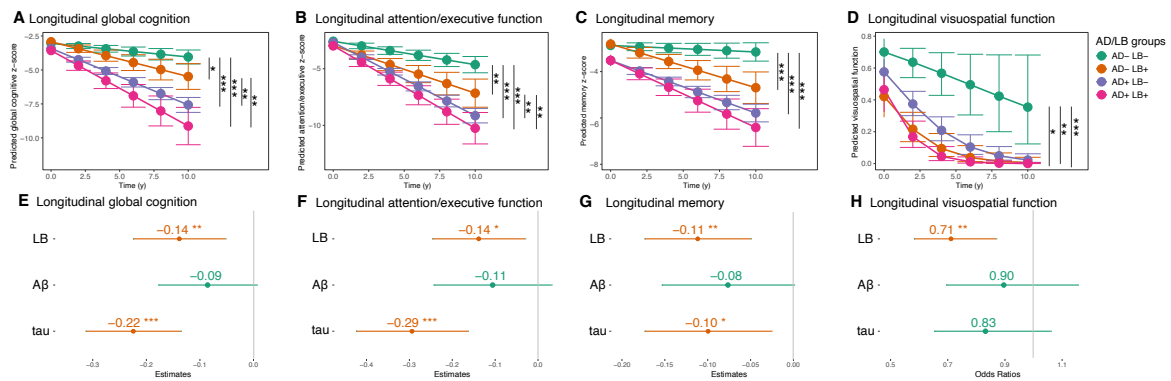

**Supplementary Figure 2A-H. Comparisons between AD/LB groups and the independent effects of LB, A $\beta$  and tau pathologies on longitudinal cognitive function with corrections for multiple comparisons.** In **A-D**, group comparisons were performed using mixed-effects models examining the AD/LB group \* time interaction, adjusted for age, sex, education, and cognitive stage (MCI/dementia). In **E-H**, the interaction time \* all three pathologies (binarized) were examined in the same model adjusted for age, sex, and education, to examine the independent effect of pathology and cognitive progression. Outcomes were z-scored cognitive tests according to the distribution in A $\beta$ -negative controls. **A-D** show estimated marginal means and 95% confidence interval of the means obtained from linear mixed-effects models by AD/LB group. In **E-H**, the dot/center shows the interaction estimates of time \* pathology and error bars represent the 95% confidence interval. In **C** and **G**, binomial mixed-effects models were used since the outcome was binary. 302 participants were AD-/LB-, 106 AD-/LB+, 377 AD+/LB-, and 98 AD+/LB+. 204 were LB+, 607 A $\beta$ +, and 489 tau+. Multiple comparison corrections were applied per outcome using the FDR method (at  $\alpha=0.05$ ). Missing data are shown in Supplementary Table 2.

\*  $p < 0.05$ ; \*\*  $p < 0.01$ ; \*\*\*  $p < 0.001$

## SUPPLEMENTARY TABLES

**Supplementary Table 1. Missing data in cross-sectional analyses (n=883)**

| <b>Variables</b>                          | <b>Missingness</b> |
|-------------------------------------------|--------------------|
| Global cognitive function <sup>1</sup>    | 37.6%              |
| Memory function <sup>2</sup>              | 6.5%               |
| Attention/executive function <sup>3</sup> | 1.3%               |
| Visuospatial function <sup>4</sup>        | 1.4%               |
| Symbol Digit Modalities Test              | 28.2%              |
| MMSE Serial 7s                            | 1.9%               |
| Presence of hallucinations (CIMP-QUEST)   | 30.2%              |
| Motor function (CIMP-QUEST)               | 24.2%              |

<sup>1</sup> Measured using the mPACC5

<sup>2</sup> Measured using the 10-word delayed recall test from ADAS-cog

<sup>3</sup> Measured using the Symbol Digit Modalities Test if present, otherwise using the serial 7s subscore from the MMSE.

<sup>4</sup> Measured using the VOSP incomplete letters task in BioFINDER-2 and pentagon copying from the MMSE in BioFINDER-1.

**Supplementary Table 2. Missing data in longitudinal analyses**

| <b>Variables</b>                          | <b>Overall<br/>(n=3,173<br/>data<br/>points)</b> | <b>Baseline<br/>(n=883)</b> | <b>1-year<br/>(n=730)</b> | <b>2-year<br/>(n=677)</b> | <b>3-year<br/>(n=349)</b> | <b>4-year<br/>(n=263)</b> | <b>5-year<br/>(n=104)</b> | <b>6-year<br/>(n=126)</b> |
|-------------------------------------------|--------------------------------------------------|-----------------------------|---------------------------|---------------------------|---------------------------|---------------------------|---------------------------|---------------------------|
| Global cognitive function <sup>1</sup>    | 56.2%                                            | 37.6%                       | 70.4%                     | 55.4%                     | 69.6%                     | 54.8%                     | 82.7%                     | 59.2%                     |
| Memory function <sup>2</sup>              | 19.4%                                            | 6.5%                        | 23.0%                     | 26.1%                     | 22.9%                     | 23.2%                     | 30.8%                     | 24.6%                     |
| Attention/executive function <sup>3</sup> | 5.0%                                             | 1.3%                        | 4.0%                      | 5.9%                      | 7.2%                      | 9.5%                      | 15.4%                     | 10.3%                     |
| Visuospatial function <sup>4</sup>        | 5.3%                                             | 1.4%                        | 3.8%                      | 5.9%                      | 6.9%                      | 10.7%                     | 17.3%                     | 14.3%                     |
| Symbol Digit Modalities Test              | 43.6%                                            | 28.2%                       | 50.6%                     | 51.1%                     | 46.1%                     | 45.6%                     | 62.5%                     | 48.4%                     |
| MMSE Serial 7s                            | 5.8%                                             | 1.9%                        | 4.3%                      | 6.9%                      | 8.0%                      | 10.3%                     | 17.3%                     | 12.7%                     |

<sup>1</sup> Measured using the mPACC5

<sup>2</sup> Measured using the 10-word delayed recall test from ADAS-cog

<sup>3</sup> Measured using the Symbol Digit Modalities Test if present, otherwise using the serial 7s subscore from the MMSE.

<sup>4</sup> Measured using the VOSP incomplete letters task in BioFINDER-2 and pentagon copying from the MMSE in BioFINDER-1.

**Supplementary Table 3. Diagnostic classification of Parkinson's disease**

| PD case | Level of certainty of baseline diagnosis (Gelb et al. <sup>47</sup> ) | Level of certainty of baseline diagnosis (MDS criteria <sup>15</sup> ) | Level of certainty of longitudinal diagnosis (Gelb et al. <sup>47</sup> ) | Level of certainty of longitudinal diagnosis (MDS criteria <sup>15</sup> ) |
|---------|-----------------------------------------------------------------------|------------------------------------------------------------------------|---------------------------------------------------------------------------|----------------------------------------------------------------------------|
| 1       | Possible                                                              | Probable                                                               | Possible                                                                  | Established                                                                |
| 2       | Probable                                                              | Established                                                            | Probable                                                                  | Established                                                                |
| 3       | Probable                                                              | Established                                                            | Probable                                                                  | Established                                                                |
| 4       | Possible                                                              | Probable                                                               | Possible                                                                  | Established                                                                |
| 5       | Probable                                                              | Established                                                            | Probable                                                                  | Established                                                                |
| 6       | Probable                                                              | Established                                                            | Probable                                                                  | Established                                                                |
| 7       | Possible                                                              | Established                                                            | Possible                                                                  | Established                                                                |
| 8       | Not fulfilling criteria                                               | Not fulfilling criteria                                                | Possible                                                                  | Probable                                                                   |
| 9       | Probable                                                              | Established                                                            | Probable                                                                  | Established                                                                |
| 10      | Possible                                                              | Probable                                                               | Possible                                                                  | Probable                                                                   |
| 11      | Possible                                                              | Probable                                                               | Probable                                                                  | Probable                                                                   |
| 12      | Probable                                                              | Established                                                            | Probable                                                                  | Established                                                                |
| 13      | Possible                                                              | Probable                                                               | Possible                                                                  | Probable                                                                   |
| 14      | Probable                                                              | Established                                                            | Probable                                                                  | Established                                                                |
| 15      | Not fulfilling criteria                                               | Not fulfilling criteria                                                | Possible                                                                  | Established                                                                |
| 16      | Possible                                                              | Probable                                                               | Possible                                                                  | Probable                                                                   |
| 17      | Possible                                                              | Probable                                                               | Probable                                                                  | Established                                                                |

Longitudinal diagnosis refers to fulfilling the diagnostic criteria either at baseline or during subsequent follow-up visits. Cases with either possible or probable PD according to Gelb et al. were classified as PD in the current study.
